# Supplementary material for: Particle focusing by 3D inertial microfluidics
Source: PubMed Central journal article supplement (PMC6444990; doi:10.1038/micronano.2017.27), 2017-07-31
Supplement: micronano201727-s1.pdf [file micronano201727-s1.pdf]

## Supplementary file

# Particle focusing by 3D inertial microfluidics

Petra Paiè<sup>1</sup>, Francesca Bragheri<sup>1</sup>, Dino Di Carlo<sup>2</sup> and Roberto Osellame<sup>1</sup>

*Microsystems & Nanoengineering* (2017) **3**, 17027; doi:10.1038/micronano.2017.27; Published online: 31 July 2017

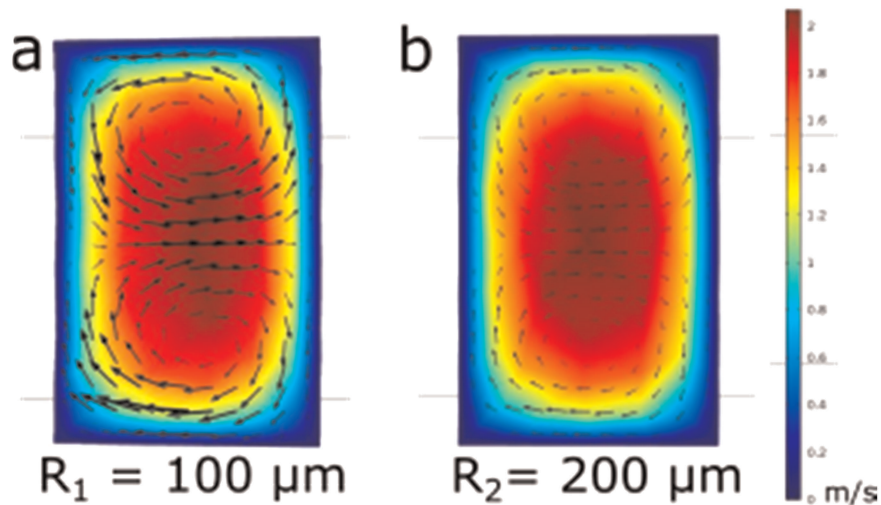

**Figure S1** (a) and (b) show the different Dean flow occurring in loops with different radii of curvature, to observe how the larger the radius, the weaker the induced secondary flow is.

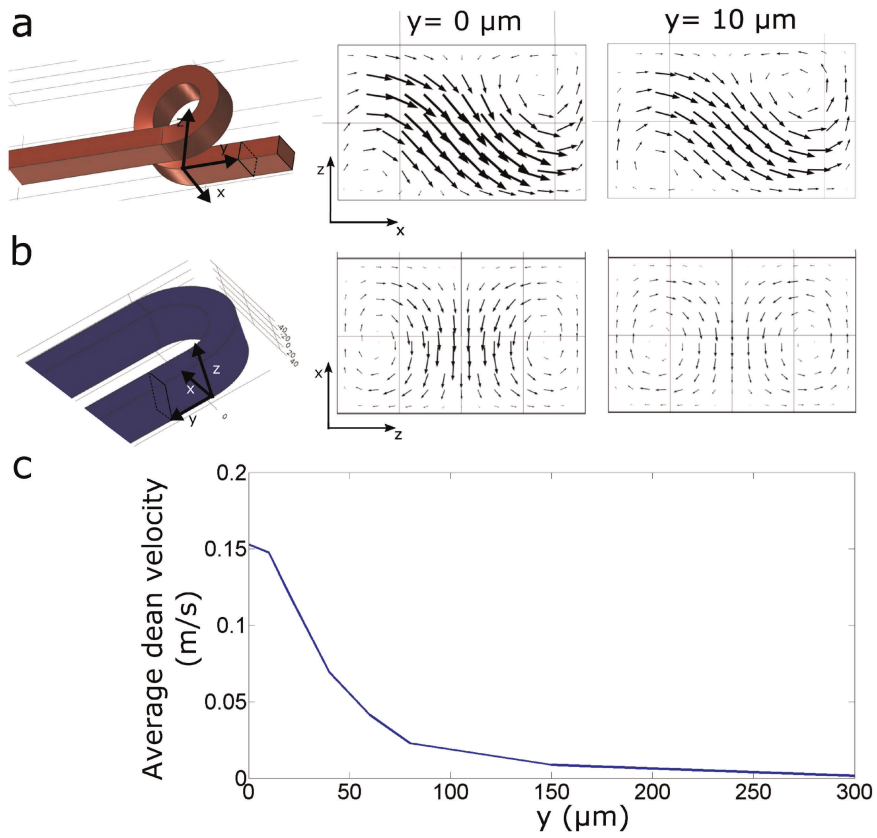

**Figure S2** (a) Shows the asymmetric Dean decay profile that follows the vertical loop, (b) Shows the profile of the secondary flow after the in plane curvature, to note that the flow symmetry in this case is maintained. (c) Shows the secondary flow velocity (averaged on the channel cross section) as a function of the distance from the loop, which is obtained from Comsol simulation. The flow velocity halves after 40  $\mu\text{m}$  and is completely negligible after 100–150  $\mu\text{m}$ .

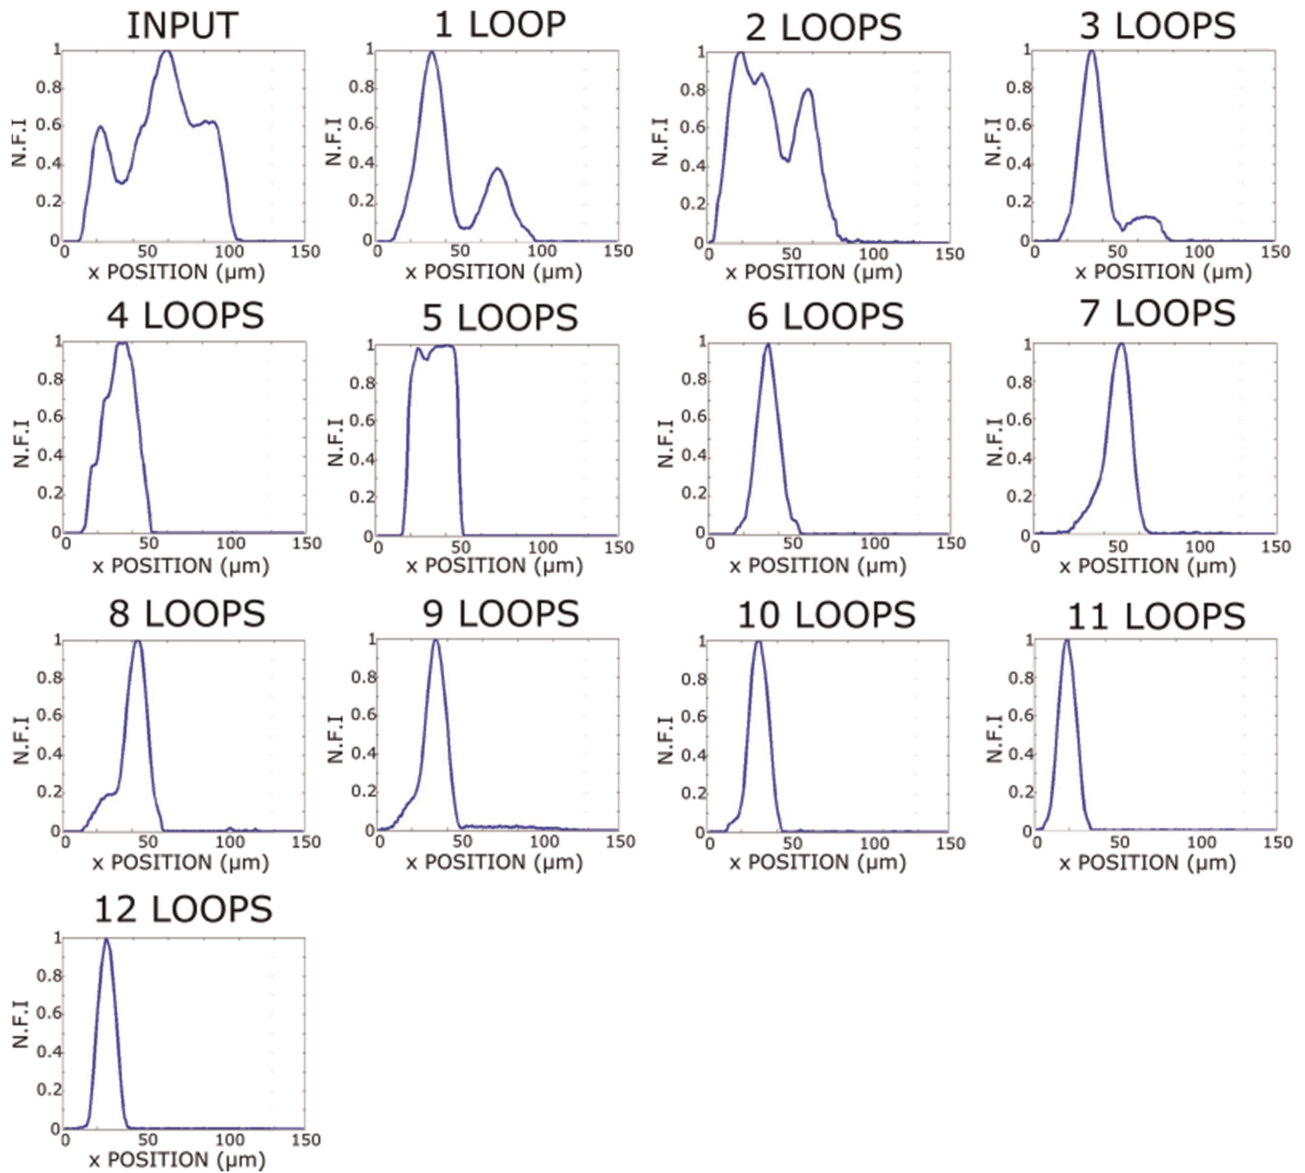

**Figure S3** Analysis of the fluorescence streak line (Normalized Fluorescence Intensity, N.F.I) in the microchannel along the device with the straight component equal to 650 μm and the loop radius of curvature (R) equal to 100 μm. The device is analyzed after each loop, to retrieve the top view particle distribution.

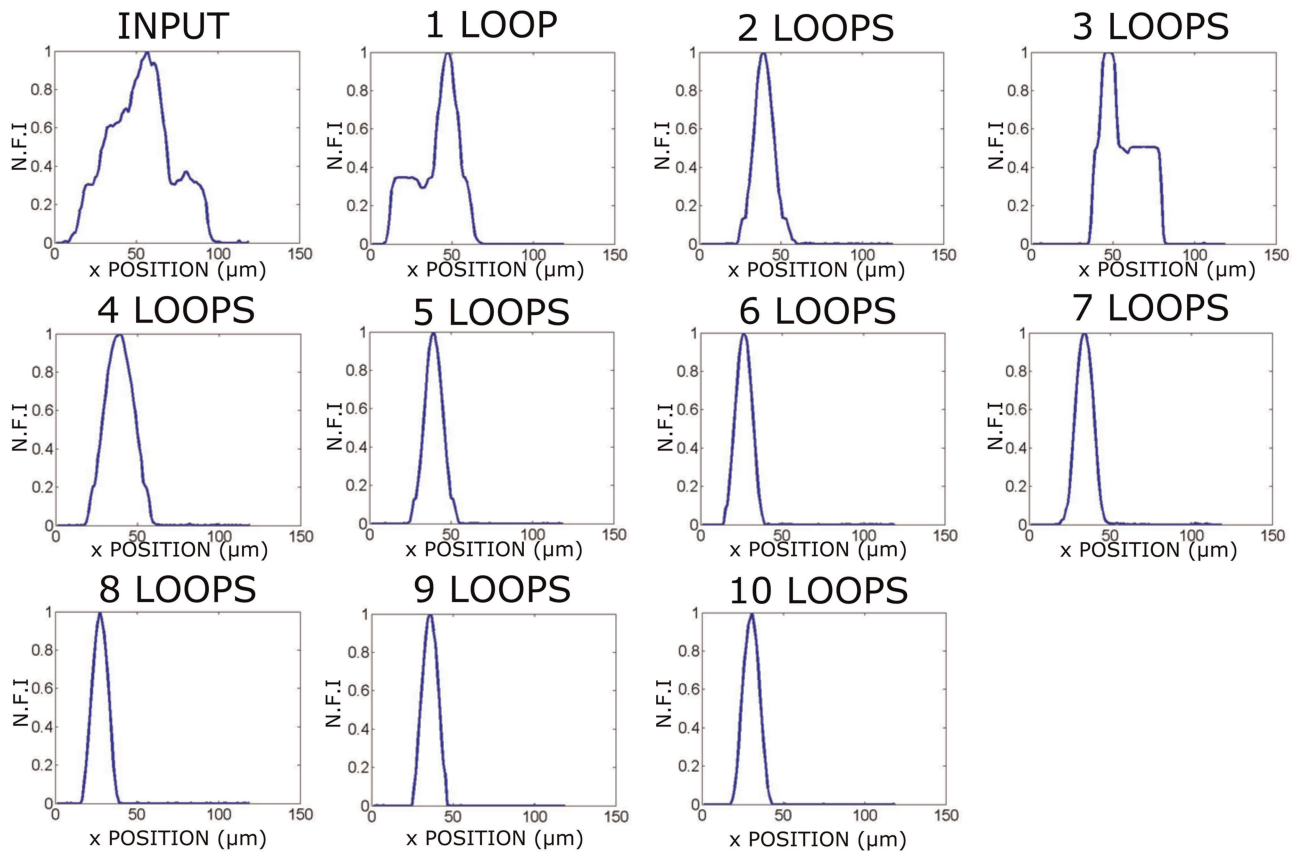

**Figure S4** Analysis of the fluorescence streak lines along the device with the reduced loop radius of curvature ( $R = 80 \mu\text{m}$ ). The device is analyzed after each loop, to retrieve the top view particle distribution.
